# Supplementary material for: Radicals Persistent above 300 ℃: from Framework Design to Solar Vapor Generation
Source: Research Square preprint supplement (doi:10.21203/rs.3.rs-1460612/v1), 2022-04-07
Supplement: Supplementary file 1 [file 56cc498a3c22930ebd78257d.pdf]

# checkCIF (basic structural check) running

Checking for embedded fcf data in CIF ...

Found embedded fcf data in CIF. Extracting fcf data from uploaded CIF, please wait ...

## checkCIF/PLATON (basic structural check)

Structure factors have been supplied for datablock(s) cu\_20210603eutta230oc1\_0m

THIS REPORT IS FOR GUIDANCE ONLY. IF USED AS PART OF A REVIEW PROCEDURE FOR PUBLICATION, IT SHOULD NOT REPLACE THE EXPERTISE OF AN EXPERIENCED CRYSTALLOGRAPHIC REFEREE.

No syntax errors found.

Please wait while processing ....

[CIF dictionary](#)

[Interpreting this report](#)

[Structure factor report](#)

### Datablock: cu\_20210603eutta230oc1\_0m

|                    |                                           |                    |
|--------------------|-------------------------------------------|--------------------|
| Bond precision:    | C-C = 0.0358 Å                            | Wavelength=1.54184 |
| Cell:              | a=16.385(3)    b=16.484(3)    c=16.295(3) |                    |
|                    | alpha=90    beta=116.11(3)    gamma=90    |                    |
| Temperature: 230 K |                                           |                    |

  

|                        | Calculated          | Reported            |
|------------------------|---------------------|---------------------|
| Volume                 | 3952.0(16)          | 3952.0(15)          |
| Space group            | C 2/c               | C 2/c               |
| Hall group             | -C 2yc              | -C 2yc              |
| Moiety formula         | C36 H14 Eu2 O13 S10 | ?                   |
| Sum formula            | C36 H14 Eu2 O13 S10 | C72 H28 Eu4 O26 S20 |
| Mr                     | 1279.01             | 2557.98             |
| Dx, g cm <sup>-3</sup> | 2.150               | 2.150               |
| Z                      | 4                   | 2                   |
| Mu (mm <sup>-1</sup> ) | 28.026              | 28.026              |
| F000                   | 2480.0              | 2480.0              |
| F000'                  | 2429.40             |                     |
| h,k,lmax               | 19,19,19            | 19,19,19            |
| Nref                   | 3632                | 3497                |
| Tmin,Tmax              | 0.102,0.106         | 0.285,0.753         |
| Tmin'                  | 0.000               |                     |

Correction method= # Reported T Limits: Tmin=0.285 Tmax=0.753  
AbsCorr = MULTI-SCAN

Data completeness= 0.963    Theta(max)= 68.511  
R(reflections)= 0.1106( 2530)    wR2(reflections)= 0.2761( 3497)  
S = 1.083    Npar= 357

The following ALERTS were generated. Each ALERT has the format

**test-name\_ALERT\_alert-type\_alert-level.**

Click on the hyperlinks for more details of the test.

#### 🟡Alert level B

[PLAT342\\_ALERT\\_3\\_B](#) Low Bond Precision on C-C Bonds ..... 0.03583 Ang.

[PLAT369\\_ALERT\\_2\\_B](#) Long C(sp2)-C(sp2) Bond C13 - C14 . 1.58 Ang.

### ● Alert level C

[PLAT029\\_ALERT\\_3\\_C](#) \_diffn\_measured\_fraction\_theta\_full value Low . 0.966 Why?  
[PLAT082\\_ALERT\\_2\\_C](#) High R1 Value ..... 0.11 Report  
[PLAT084\\_ALERT\\_3\\_C](#) High wR2 Value (i.e. > 0.25) ..... 0.28 Report  
[PLAT088\\_ALERT\\_3\\_C](#) Poor Data / Parameter Ratio ..... 9.80 Note  
[PLAT213\\_ALERT\\_2\\_C](#) Atom O4 has ADP max/min Ratio ..... 3.5 prolat  
[PLAT241\\_ALERT\\_2\\_C](#) High 'MainMol' Ueq as Compared to Neighbors of 01 Check  
[PLAT241\\_ALERT\\_2\\_C](#) High 'MainMol' Ueq as Compared to Neighbors of 05 Check  
[PLAT242\\_ALERT\\_2\\_C](#) Low 'MainMol' Ueq as Compared to Neighbors of Eu1 Check

#### And 5 other PLAT242 Alerts

[PLAT242\\_ALERT\\_2\\_C](#) Low 'MainMol' Ueq as Compared to Neighbors of C1 Check  
[PLAT242\\_ALERT\\_2\\_C](#) Low 'MainMol' Ueq as Compared to Neighbors of C3 Check  
[PLAT242\\_ALERT\\_2\\_C](#) Low 'MainMol' Ueq as Compared to Neighbors of C4 Check  
[PLAT242\\_ALERT\\_2\\_C](#) Low 'MainMol' Ueq as Compared to Neighbors of C6 Check  
[PLAT242\\_ALERT\\_2\\_C](#) Low 'MainMol' Ueq as Compared to Neighbors of C7 Check

[PLAT260\\_ALERT\\_2\\_C](#) Large Average Ueq of Residue Including Eu1 0.102 Check  
[PLAT906\\_ALERT\\_3\\_C](#) Large K Value in the Analysis of Variance ..... 14.679 Check  
[PLAT906\\_ALERT\\_3\\_C](#) Large K Value in the Analysis of Variance ..... 2.831 Check  
[PLAT911\\_ALERT\\_3\\_C](#) Missing FCF Refl Between Thmin & STh/L= 0.600 122 Report  
[PLAT971\\_ALERT\\_2\\_C](#) Check Calcd Resid. Dens. 0.89A From Eu1 1.90 eA-3  
[PLAT972\\_ALERT\\_2\\_C](#) Check Calcd Resid. Dens. 0.67A From Eu1 -1.80 eA-3  
[PLAT973\\_ALERT\\_2\\_C](#) Check Calcd Positive Resid. Density on Eu1 1.45 eA-3  
[PLAT976\\_ALERT\\_2\\_C](#) Check Calcd Resid. Dens. 0.74A From 07 -0.91 eA-3

#### And 3 other PLAT976 Alerts

[PLAT976\\_ALERT\\_2\\_C](#) Check Calcd Resid. Dens. 0.77A From 07 -0.71 eA-3  
[PLAT976\\_ALERT\\_2\\_C](#) Check Calcd Resid. Dens. 1.06A From 07 -0.71 eA-3  
[PLAT976\\_ALERT\\_2\\_C](#) Check Calcd Resid. Dens. 0.55A From 07 -0.70 eA-3

[PLAT977\\_ALERT\\_2\\_C](#) Check Negative Difference Density on H7 -0.38 eA-3  
[PLAT977\\_ALERT\\_2\\_C](#) Check Negative Difference Density on H18 -0.67 eA-3

### ● Alert level G

[PLAT002\\_ALERT\\_2\\_G](#) Number of Distance or Angle Restraints on AtSite 27 Note  
[PLAT003\\_ALERT\\_2\\_G](#) Number of Uiso or Uij Restrained non-H Atoms ... 24 Report  
[PLAT004\\_ALERT\\_5\\_G](#) Polymeric Structure Found with Maximum Dimension 3 Info  
[PLAT045\\_ALERT\\_1\\_G](#) Calculated and Reported Z Differ by a Factor ... 2.00 Check  
[PLAT083\\_ALERT\\_2\\_G](#) SHELXL Second Parameter in WGHT Unusually Large 231.40 Why ?  
[PLAT171\\_ALERT\\_4\\_G](#) The CIF-Embedded .res File Contains EADP Records 4 Report  
[PLAT172\\_ALERT\\_4\\_G](#) The CIF-Embedded .res File Contains DFIX Records 2 Report  
[PLAT174\\_ALERT\\_4\\_G](#) The CIF-Embedded .res File Contains FLAT Records 2 Report  
[PLAT175\\_ALERT\\_4\\_G](#) The CIF-Embedded .res File Contains SAME Records 4 Report  
[PLAT176\\_ALERT\\_4\\_G](#) The CIF-Embedded .res File Contains SADI Records 3 Report  
[PLAT178\\_ALERT\\_4\\_G](#) The CIF-Embedded .res File Contains SIMU Records 3 Report  
[PLAT301\\_ALERT\\_3\\_G](#) Main Residue Disorder .....(Resd 1 ) 36% Note  
[PLAT774\\_ALERT\\_1\\_G](#) Check X-Y Bond in CIF: Eu1 --Eu1 .. 4.46 Ang.  
[PLAT794\\_ALERT\\_5\\_G](#) Tentative Bond Valency for Eu1 (III) . 3.46 Info  
[PLAT811\\_ALERT\\_5\\_G](#) No ADDSYM Analysis: Too Many Excluded Atoms .... ! Info  
[PLAT860\\_ALERT\\_3\\_G](#) Number of Least-Squares Restraints ..... 336 Note  
[PLAT910\\_ALERT\\_3\\_G](#) Missing # of FCF Reflection(s) Below Theta(Min). 1 Note  
[PLAT912\\_ALERT\\_4\\_G](#) Missing # of FCF Reflections Above STh/L= 0.600 13 Note  
[PLAT913\\_ALERT\\_3\\_G](#) Missing # of Very Strong Reflections in FCF .... 2 Note  
[PLAT941\\_ALERT\\_3\\_G](#) Average HKL Measurement Multiplicity ..... 3.3 Low  
[PLAT978\\_ALERT\\_2\\_G](#) Number C-C Bonds with Positive Residual Density. 0 Info

0 **ALERT level A** = Most likely a serious problem - resolve or explain

2 **ALERT level B** = A potentially serious problem, consider carefully

26 **ALERT level C** = Check. Ensure it is not caused by an omission or oversight

21 **ALERT level G** = General information/check it is not something unexpected

2 **ALERT type 1** CIF construction/syntax error, inconsistent or missing data

25 **ALERT type 2** Indicator that the structure model may be wrong or deficient

12 **ALERT type 3** Indicator that the structure quality may be low

7 **ALERT type 4** Improvement, methodology, query or suggestion

3 **ALERT type 5** Informative message, check

It is advisable to attempt to resolve as many as possible of the alerts in all categories. Often the minor alerts point to easily fixed oversights, errors and omissions in your CIF or refinement strategy, so attention to these fine details can be worthwhile. In order to resolve some of the more serious problems it may be necessary to carry out additional measurements or structure refinements. However, the purpose of your study may justify the reported deviations and the more serious of these should normally be commented upon in the discussion or experimental section of a paper or in the "special\_details" fields of the CIF. checkCIF was carefully designed to identify outliers and unusual parameters, but every test has its limitations and alerts that are not important in a particular case may appear. Conversely, the absence of alerts does not guarantee there are no aspects of the results needing attention. It is up to the individual to critically assess their own results and, if necessary, seek expert advice.

### **Publication of your CIF in IUCr journals**

A basic structural check has been run on your CIF. These basic checks will be run on all CIFs submitted for publication in IUCr journals (*Acta Crystallographica*, *Journal of Applied Crystallography*, *Journal of Synchrotron Radiation*); however, if you intend to submit to *Acta Crystallographica Section C* or *E* or *IUCrData*, you should make sure that [full publication checks](#) are run on the final version of your CIF prior to submission.

### **Publication of your CIF in other journals**

Please refer to the *Notes for Authors* of the relevant journal for any special instructions relating to CIF submission.

---

PLATON version of 03/06/2021; check.def file version of 02/06/2021

**Datablock cu\_20210603eutta230oc1\_0m - ellipsoid plot**

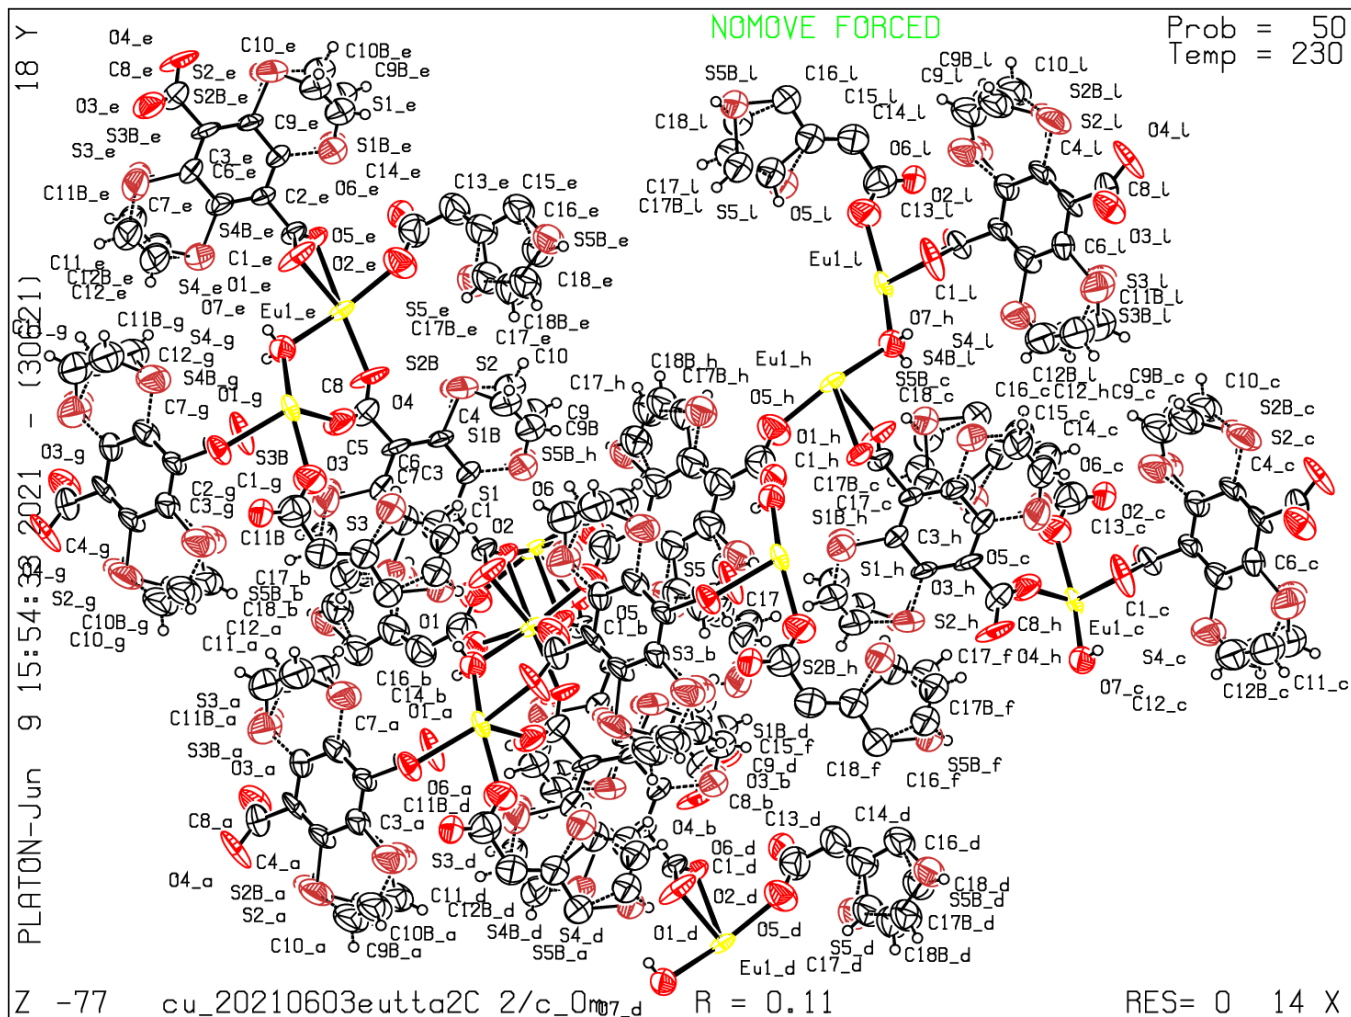

[Download CIF editor \(publCIF\) from the IUCr](#)  
[Download CIF editor \(enCIFer\) from the CCDC](#)  
[Test a new CIF entry](#)
